# Supplementary material
Source: ML conference proceedings conference paper supplement (https://proceedings.mlr.press/v97/nagaraj19a.html)
Supplement: Supplementary file [file nagaraj19a-supp.pdf]

## A. Supplementary Material

**Lemma 6.** Consider  $\mathbb{R}^d$  endowed with the standard inner product. For any convex set  $\mathcal{W} \subset \mathbb{R}^d$  and the associated projection operator  $\Pi_{\mathcal{W}}$ , we have:

$$\|\Pi_{\mathcal{W}}(a) - \Pi_{\mathcal{W}}(b)\| \leq \|a - b\|$$

For all  $a, b \in \mathbb{R}^d$

*Proof.* By Lemma 3.1.4 in (Nesterov, 2013), we conclude:

$$\langle a - \Pi_{\mathcal{W}}(a), \Pi_{\mathcal{W}}(b) - \Pi_{\mathcal{W}}(a) \rangle \leq 0.$$

Similarly,

$$\langle b - \Pi_{\mathcal{W}}(b), \Pi_{\mathcal{W}}(a) - \Pi_{\mathcal{W}}(b) \rangle \leq 0.$$

Adding the equations above, we conclude:

$$\|\Pi_{\mathcal{W}}(a) - \Pi_{\mathcal{W}}(b)\|^2 \leq \langle a - b, \Pi_{\mathcal{W}}(a) - \Pi_{\mathcal{W}}(b) \rangle$$

Using Cauchy-Schwarz inequality on the RHS, we conclude the result.  $\square$

### A.1. Proof of Theorem 2

We have chosen  $\alpha_{k,i} = \alpha = \min\left(\frac{2}{L}, 4l \frac{\log nK}{\mu nK}\right)$ . By definition:  $x_{i+1}^k = \Pi_{\mathcal{W}}(x_i^k - \alpha \nabla f(x_i^k; \sigma_k(i+1)))$ .

Taking norm squared and using Lemma 6

$$\begin{aligned} & \|x_{i+1}^k - x^*\|^2 \\ & \leq \|x_i^k - x^*\|^2 - 2\alpha \langle \nabla f(x_i^k; \sigma_k(i+1)), x_i^k - x^* \rangle \\ & \quad + \alpha^2 \|\nabla f(x_i^k; \sigma_k(i+1))\|^2 \\ & \leq \|x_i^k - x^*\|^2 - 2\alpha \langle \nabla f(x_i^k; \sigma_k(i+1)), x_i^k - x^* \rangle \\ & \quad + \alpha^2 G^2 \\ & \leq \|x_i^k - x^*\|^2 - 2\alpha \langle \nabla F(x_i^k), x_i^k - x^* \rangle \\ & \quad + 2\alpha \langle \nabla F(x_i^k) - \nabla f(x_i^k; \sigma_k(i+1)), x_i^k - x^* \rangle + \alpha^2 G^2 \\ & \leq \|x_i^k - x^*\|^2 (1 - \alpha\mu) - 2\alpha [F(x_i^k) - F(x^*)] \\ & \quad + 2\alpha R_{i,k} + \alpha^2 G^2 \end{aligned} \quad (13)$$

We have used strong convexity of  $F(\cdot)$  in the fourth step. Here  $R_{i,k} := \langle \nabla F(x_i^k) - \nabla f(x_i^k; \sigma_k(i+1)), x_i^k - x^* \rangle$ . We will bound  $\mathbb{E}[R_{i,k}]$ .

Clearly,

$$\begin{aligned} R_{i,k} &= \frac{1}{n} \sum_{r=1}^n \langle \nabla f(x_i^k; r), x_i^k - x^* \rangle \\ & \quad - \langle \nabla f(x_i^k; \sigma_k(i+1)), x_i^k - x^* \rangle \end{aligned}$$

Recall the definition of  $\mathcal{D}_{i,k}$  and  $\mathcal{D}_{i,k}^{(r)}$  from Section 4. Let  $Y \sim \mathcal{D}_{i,k}$  and  $Z_r \sim \mathcal{D}_{i,k}^{(r)}$ , with any arbitrary coupling. Taking expectation in the expression for  $R_{i,k}$ , we have:

$$\begin{aligned} \mathbb{E}[R_{i,k}] &= \frac{1}{n} \sum_{r=1}^n \mathbb{E}[\langle \nabla f(x_i^k; r), x_i^k - x^* \rangle] \\ & \quad - \frac{1}{n} \sum_{r=1}^n \mathbb{E}[\langle \nabla f(x_i^k; r), x_i^k - x^* \rangle | \sigma_k(i+1) = r] \\ &= \frac{1}{n} \sum_{r=1}^n \mathbb{E}[\langle \nabla f(Y; r), Y - x^* \rangle - \langle \nabla f(Z_r; r), Z_r - x^* \rangle] \\ &= \frac{1}{n} \sum_{r=1}^n \mathbb{E} \left[ \langle \nabla f(Y; r) - \nabla f(Z_r; r), Y - x^* \rangle \right. \\ & \quad \left. + \langle \nabla f(Z_r; r), Y - Z_r \rangle \right] \\ &\leq \frac{1}{n} \sum_{r=1}^n \mathbb{E}[L \|Y - x^*\| \cdot \|Z_r - Y\| + G \|Z_r - Y\|] \\ &\leq \frac{1}{n} \sum_{r=1}^n L \sqrt{\mathbb{E}[\|Y - x^*\|^2]} \sqrt{\mathbb{E}[\|Z_r - Y\|^2]} + G \mathbb{E}[\|Z_r - Y\|] \end{aligned}$$

We have used smoothness of  $f(\cdot; r)$  and Cauchy-Schwarz inequality in the fourth step and Cauchy-Schwarz inequality in the fifth step. Since the inequality above holds for every coupling between  $Y$  and  $Z_r$ , we conclude:

$$\begin{aligned} \mathbb{E}[R_{i,k}] &\leq \frac{1}{n} \sum_{r=1}^n L D_{\mathcal{W}}^{(2)}(\mathcal{D}_{i,k}, \mathcal{D}_{i,k}^{(r)}) \sqrt{\mathbb{E}[\|x_i^k - x^*\|^2]} \\ & \quad + G D_{\mathcal{W}}^{(2)}(\mathcal{D}_{i,k}, \mathcal{D}_{i,k}^{(r)}) \\ &\leq \frac{1}{n} \sum_{r=1}^n \frac{L^2}{\mu} \left[ D_{\mathcal{W}}^{(2)}(\mathcal{D}_{i,k}, \mathcal{D}_{i,k}^{(r)}) \right]^2 + \frac{\mu}{4} \mathbb{E}[\|x_i^k - x^*\|^2] \\ & \quad + G D_{\mathcal{W}}^{(2)}(\mathcal{D}_{i,k}, \mathcal{D}_{i,k}^{(r)}) \end{aligned} \quad (14)$$

by our hypothesis we have  $\alpha \leq \frac{2}{L}$ . So we can apply Lemma 4. Equation (14) along with equation (13) implies:

$$\begin{aligned} & \mathbb{E}\|x_{i+1}^k - x^*\|^2 \\ & \leq \mathbb{E}\|x_i^k - x^*\|^2 (1 - \alpha\mu) - 2\alpha \mathbb{E}[F(x_i^k) - F(x^*)] \\ & \quad + 2\alpha \mathbb{E}R_{i,k} + \alpha^2 G^2 \\ & \leq \mathbb{E}\|x_i^k - x^*\|^2 \left(1 - \frac{\alpha\mu}{2}\right) - 2\alpha \mathbb{E}[F(x_i^k) - F(x^*)] \\ & \quad + 3G^2 \alpha^2 + \frac{4L^2 G^2 \alpha^3}{\mu} \end{aligned}$$

We use the fact that  $F(x_i^k) - F(x^*) \geq 0$  and unroll the recursion above to conclude:

$$\begin{aligned} \mathbb{E}[\|x_0^{k+1} - x^*\|^2] &\leq \left(1 - \frac{\alpha\mu}{2}\right)^{nk} \|x_0^1 - x^*\|^2 \\ &\quad + \sum_{t=0}^{\infty} \left(1 - \frac{\alpha\mu}{2}\right)^t \left[3G^2\alpha^2 + \frac{4L^2G^2\alpha^3}{\mu}\right] \\ &= \left(1 - \frac{\alpha\mu}{2}\right)^{nk} \|x_0^1 - x^*\|^2 + \left[\frac{6G^2\alpha}{\mu} + \frac{8L^2G^2\alpha^2}{\mu^2}\right] \\ &\leq e^{-\frac{n\alpha\mu}{2}} \|x_0^1 - x^*\|^2 + \left[\frac{6G^2\alpha}{\mu} + \frac{8L^2G^2\alpha^2}{\mu^2}\right] \end{aligned}$$

Using the fact that  $\alpha = \min\left(\frac{2}{L}, 4l\frac{\log nK}{\mu nK}\right)$ , we conclude that when  $k \geq \frac{K}{2}$ ,

$$\mathbb{E}[\|x_0^{k+1} - x^*\|^2] \leq \frac{\|x_0^1 - x^*\|^2}{(nK)^t} + \left[\frac{6G^2\alpha}{\mu} + \frac{8L^2G^2\alpha^2}{\mu^2}\right] \quad (15)$$

We can easily verify that equation 12 also holds in this case (because all other assumptions hold). Therefore, for  $k \geq \frac{K}{2}$ ,

$$\mathbb{E}[\|x_{i+1}^k - x^*\|^2] \leq \mathbb{E}[\|x_i^k - x^*\|^2] - 2\alpha\mathbb{E}[F(x_i^k) - F(x^*)] + 5\alpha^2G^2$$

Summing this equation for  $0 \leq i \leq n-1$ ,  $\lceil \frac{K}{2} \rceil \leq k \leq K$ , we conclude:

$$\begin{aligned} &\frac{1}{n(K - \lceil \frac{K}{2} \rceil + 1)} \sum_{k=\lceil \frac{K}{2} \rceil}^K \sum_{i=0}^{n-1} \mathbb{E}(F(x_i^k) - F(x^*)) \\ &\leq \frac{1}{2n\alpha(K - \lceil \frac{K}{2} \rceil + 1)} \mathbb{E}\|x_0^{\lceil \frac{K}{2} \rceil} - x^*\|^2 + \frac{5}{2}\alpha G^2 \\ &= O\left(\mu \frac{\|x_0^1 - x^*\|^2}{(nK)^t} + L \frac{\|x_0^1 - x^*\|^2}{(nK)^{(t+1)}}\right) \\ &\quad + O\left(\frac{G^2 \log nK}{\mu nK} + \frac{L^2 G^2 \log nK}{\mu^3 n^2 K^2}\right) \end{aligned}$$

In the last step we have used Equation (15) and the fact that  $\alpha \leq \frac{4l \log nK}{\mu nK}$  and  $\frac{1}{\alpha} \leq \frac{L}{2} + \frac{nK\mu}{4l \log nK}$ . Using convexity of  $F$ , we conclude that:

$$F(\hat{x}) \leq \frac{1}{n(K - \lceil \frac{K}{2} \rceil + 1)} \sum_{k=\lceil \frac{K}{2} \rceil}^K \sum_{i=0}^{n-1} F(x_i^k).$$

This proves the result.

## B. Proofs of useful lemmas

*Proof of Lemma 2.* For simplicity of notation, we denote  $y_i \stackrel{\text{def}}{=} x_i(\sigma_k)$  and  $z_i \stackrel{\text{def}}{=} x_i(\sigma'_k)$ . We know that  $\|y_0 - z_0\| =$

0 almost surely by definition. Let  $j < i$ . First we Suppose  $\tau_y(j+1) = r \neq s = \tau_z(j+1)$ . Then, by Lemma 6

$$\begin{aligned} &\|y_{j+1} - z_{j+1}\| \\ &= \|\Pi_{\mathcal{W}}(y_j - \alpha_{k,j}\nabla f(y_j; r)) \\ &\quad - \Pi_{\mathcal{W}}(z_j - \alpha_{k,j}\nabla f(z_j; s))\| \\ &\leq \|y_j - z_j - \alpha_{k,j}(\nabla f(y_j; r) - \nabla f(z_j; s))\| \\ &\leq \|y_j - z_j\| + \alpha_{k,j}\|\nabla f(y_j; r)\| + \alpha_{k,j}\|\nabla f(z_j; s)\| \\ &\leq 2G\alpha_{k,j} + \|y_j - z_j\| \\ &\leq 2G\alpha_{k,0} + \|y_j - z_j\| \end{aligned}$$

In the last step above, we have used monotonicity of  $\alpha_t$ . Now, suppose  $\tau_y(j+1) = \tau_z(j+1) = r$ . Then,

$$\begin{aligned} &\|y_{j+1} - z_{j+1}\|^2 \\ &= \|\Pi_{\mathcal{W}}(y_j - \alpha_{k,j}\nabla f(y_j; r)) \\ &\quad - \Pi_{\mathcal{W}}(z_j - \alpha_{k,j}\nabla f(z_j; r))\|^2 \\ &\leq \|(y_j - \alpha_{k,j}\nabla f(y_j; r)) - (z_j - \alpha_{k,j}\nabla f(z_j; r))\|^2 \\ &= \|y_j - z_j\|^2 - 2\alpha_{k,j}\langle \nabla f(y_j; r) - \nabla f(z_j; r), y_j - z_j \rangle \\ &\quad + \alpha_{k,j}^2 \|\nabla f(y_j; r) - \nabla f(z_j; r)\|^2 \\ &\leq \|y_j - z_j\|^2 \\ &\quad - (2\alpha_{k,j} - L\alpha_{k,j}^2)\langle \nabla f(y_j; r) - \nabla f(z_j; r), y_j - z_j \rangle \\ &\leq \|y_j - z_j\|^2 \end{aligned}$$

In the second equation we have used Lemma 3 and in the third equation we have used the fact that when  $\alpha_{k,0} \leq \frac{2}{L}$ ,  $2\alpha_{k,i} - L\alpha_{k,i}^2 \geq 0$  and  $\langle \nabla f(y_i; r) - \nabla f(z_i; r), y_i - z_i \rangle \geq 0$  by convexity. This proves the lemma.  $\square$

*Proof of Lemma 5.* For the sake of clarity of notation, in this proof we take  $R_j := \sigma_k(j)$  for all  $j \in [n]$ . By definition,  $x_{j+1}^k - x_0^k = \Pi_{\mathcal{W}}(x_j^k - \alpha_{k,j}\nabla f(x_j^k; R_{j+1})) - x_0^k$ . Taking norm squared on both sides, we have:

$$\begin{aligned} &\|x_{j+1}^k - x_0^k\|^2 \\ &\leq \|x_j^k - x_0^k\|^2 - 2\alpha_{k,j}\langle f(x_j^k; R_{j+1}), x_j^k - x_0^k \rangle + \alpha_{k,j}^2 G^2 \\ &\leq \|x_j^k - x_0^k\|^2 + 2\alpha_{k,j}(f(x_0^k; R_{j+1}) - f(x_j^k; R_{j+1})) \\ &\quad + \alpha_{k,j}^2 G^2 \end{aligned}$$

Taking expectation on both sides, we have:

$$\begin{aligned}
 & \mathbb{E}[\|x_{j+1}^k - x_0^k\|^2] \\
 & \leq \mathbb{E}[\|x_j^k - x_0^k\|^2] + \alpha_{k,j}^2 G^2 \\
 & \quad + 2\alpha_{k,j} \mathbb{E}[f(x_0^k; R_{j+1}) - f(x_j^k; R_{j+1})] \\
 & = \mathbb{E}[\|x_j^k - x_0^k\|^2] + 2\alpha_{k,j} \mathbb{E}[F(x_0^k) - f(x_j^k; R_{j+1})] \\
 & \quad + \alpha_{k,j}^2 G^2 \\
 & = \mathbb{E}[\|x_j^k - x_0^k\|^2] + 2\alpha_{k,j} \mathbb{E}[F(x_0^k) - F(x_j^k)] \\
 & \quad + 2\alpha_{k,j} \mathbb{E}[F(x_j^k) - f(x_j^k; R_{j+1})] + \alpha_{k,j}^2 G^2 \\
 & \leq \mathbb{E}[\|x_j^k - x_0^k\|^2] + 2\alpha_{k,j} \mathbb{E}[F(x_0^k) - F(x_j^k)] \\
 & \quad + 4\alpha_{k,j} \alpha_{k,0} G^2 + \alpha_{k,j}^2 G^2 \\
 & \leq \mathbb{E}[\|x_j^k - x_0^k\|^2] + 2\alpha_{k,j} \mathbb{E}[F(x_0^k) - F(x^*)] \\
 & \quad + 4\alpha_{k,j} \alpha_{k,0} G^2 + \alpha_{k,j}^2 G^2
 \end{aligned}$$

In the fourth step we have used Lemma 4 and in the fifth step, we have used the fact that  $x^*$  is the minimizer of  $F$ . We sum the equation above from  $j = 0$  to  $j = i - 1$  and use the fact that  $\alpha_{k,0} \geq \alpha_{k,j}$  and that  $\|x_j^k - x_0^k\| = 0$  when  $j = 0$  to conclude the result. For the proof of the second equation in the lemma, we use  $x^*$  instead of  $x_0^k$  above and go through similar steps.  $\square$
